# Supplementary material for: Lack of 2'-O-methylation in the tRNA anticodon loop of two phylogenetically distant yeast species activates the general amino acid control pathway
Source: PubMed Central journal article supplement (PMC5892943; doi:10.1371/journal.pgen.1007288), 2018-03-29
Supplement: pgen.1007288.s006.pdf [file pgen.1007288.s006.pdf]

**Table S1. *frs1* and *frs2* mutations identified in *trm7Δ* suppressors.**

| Strain               | <i>frs1</i> | <i>frs2</i> |
|----------------------|-------------|-------------|
| <i>trm7Δ</i> supp 1  | E415K       |             |
| <i>trm7Δ</i> supp 2  | Y532C       |             |
| <i>trm7Δ</i> supp 3  | A549T       |             |
| <i>trm7Δ</i> supp 4  | V361A       |             |
| <i>trm7Δ</i> supp 5  |             | V101F       |
| <i>trm7Δ</i> supp 6  | WT          | WT          |
| <i>trm7Δ</i> supp 7  | L567F       |             |
| <i>trm7Δ</i> supp 8  |             | D275G       |
| <i>trm7Δ</i> supp 9  | D55H        |             |
| <i>trm7Δ</i> supp 10 | N486S       |             |
| <i>trm7Δ</i> supp 11 | A58S        |             |
| <i>trm7Δ</i> supp 12 | WT          | WT          |
| <i>trm7Δ</i> supp 13 | A549T       |             |
| <i>trm7Δ</i> supp 14 |             | L265V       |
| <i>trm7Δ</i> supp 15 | V430A       |             |
| <i>trm7Δ</i> supp 16 |             | L265I       |
| <i>trm7Δ</i> supp 17 | D579T       |             |
| <i>trm7Δ</i> supp 18 |             | V267I       |
| <i>trm7Δ</i> supp 19 | G500A       |             |
| <i>trm7Δ</i> supp 20 |             | P268T       |
| <i>trm7Δ</i> supp 21 | D62N        |             |
