# Supplementary material for: Lack of 2'-O-methylation in the tRNA anticodon loop of two phylogenetically distant yeast species activates the general amino acid control pathway
Source: PubMed Central journal article supplement (PMC5892943; doi:10.1371/journal.pgen.1007288), 2018-03-29
Supplement: pgen.1007288.s007.pdf [file pgen.1007288.s007.pdf]

**Table S2. Relative mRNA levels in Fig. 2.**

| Fig. 2 | media             | strain                       | <i>HIS5/ACT1</i> | <i>LYS1/ACT1</i> |
|--------|-------------------|------------------------------|------------------|------------------|
| A      | rich              | WT                           | 1.0 ± 0.3        | 1.0 ± 0.3        |
|        |                   | <i>trm7Δ</i> [ <i>TRM7</i> ] | 1.7 ± 0.6        | 1.9 ± 0.5        |
|        |                   | <i>trm7Δ</i>                 | 27.8 ± 3.0       | 90.9 ± 13.4      |
|        | synthetic minimal | WT                           | 1.0 ± 0.1        | 2.9 ± 0.3        |
|        |                   | <i>trm7Δ</i> [ <i>TRM7</i> ] | 3.1 ± 0.2        | 7.9 ± 1.1        |
|        |                   | <i>trm7Δ</i>                 | 17.1 ± 1.6       | 43.2 ± 2.1       |
| B      | rich              | WT                           | 1.0 ± 0.3        |                  |
|        |                   | <i>trm7Δ</i>                 | 50.5 ± 10.5      |                  |
|        | 0 mM 3-AT         |                              | 1.0 ± 0.1        |                  |
|        | 10 mM 3-AT        | WT His <sup>+</sup>          | 44.3 ± 8.1       |                  |
|        | 100 mM 3-AT       |                              | 62.1 ± 0.2       |                  |
| C      | rich              | WT                           | 1.0 ± 0.4        |                  |
|        |                   | <i>trm7Δ</i>                 | 88.0 ± 9.6       |                  |
|        |                   | <i>gcn2Δ</i>                 | 1.3 ± 0.1        |                  |
|        |                   | <i>trm7Δ gcn2Δ</i>           | 1.7 ± 0.1        |                  |
|        |                   | <i>gcn4Δ</i>                 | 0.8 ± 0.2        |                  |
|        |                   | <i>trm7Δ gcn4Δ</i>           | 1.9 ± 0.2        |                  |
| E      | rich              | WT                           | 1.0 ± 0.1        |                  |
|        |                   | <i>trm7Δ</i>                 | 46.8 ± 2.3       |                  |
|        |                   | <i>trm732Δ</i>               | 0.9 ± 0.2        |                  |
|        |                   | <i>trm734Δ</i>               | 1.0 ± 0.1        |                  |
|        |                   | <i>tyw1Δ</i>                 | 0.8 ± 0.2        |                  |
|        |                   | <i>trm732Δ tyw1Δ</i>         | 1.5 ± 0.2        |                  |
|        |                   | <i>trm734Δ tyw1Δ</i>         | 1.2 ± 0.3        |                  |
|        |                   | <i>trm732Δ trm734Δ</i>       | 43.2 ± 5.1       |                  |
