# Supplementary material for: Lack of 2'-O-methylation in the tRNA anticodon loop of two phylogenetically distant yeast species activates the general amino acid control pathway
Source: PubMed Central journal article supplement (PMC5892943; doi:10.1371/journal.pgen.1007288), 2018-03-29
Supplement: pgen.1007288.s008.pdf [file pgen.1007288.s008.pdf]

**Table S3. Relative mRNA levels in Fig. 3.**

| Fig. 3            | strain                               | <i>HIS5/ACT1</i> |
|-------------------|--------------------------------------|------------------|
| A                 | WT                                   | 1.0 ± 0.2        |
|                   | <i>trm7Δ</i>                         | 37.3 ± 5.7       |
|                   | <i>frs1-E415K</i>                    | 1.3 ± 0.1        |
|                   | <i>frs1-Y532C</i>                    | 1.6 ± 0.5        |
|                   | <i>frs1-A549T</i>                    | 1.8 ± 0.6        |
|                   | <i>frs1-V361A</i>                    | 2.4 ± 0.3        |
|                   | <i>frs2-V101F</i>                    | 1.4 ± 0.2        |
|                   | supp 6                               | 4.7 ± 0.6        |
|                   | <i>frs2-D275G</i>                    | 1.3 ± 0.1        |
|                   | <i>frs1-D55H</i>                     | 1.3 ± 0.1        |
|                   | <i>frs1-N486S</i>                    | 1.6 ± 0.1        |
|                   | WT                                   | 1.0 ± 0.2        |
|                   | <i>trm7Δ</i>                         | 36.1 ± 1.6       |
|                   | <i>frs1-A58S</i>                     | 1.8 ± 0.9        |
|                   | supp 12                              | 5.5 ± 1.4        |
|                   | <i>frs2-L265V</i>                    | 1.7 ± 0.2        |
|                   | <i>frs1-V430A</i>                    | 3.7 ± 0.2        |
|                   | <i>frs1-D579T</i>                    | 2.0 ± 0.2        |
|                   | <i>frs2-V267I</i>                    | 1.1 ± 0.2        |
|                   | <i>frs1-G500A</i>                    | 1.6 ± 0.4        |
| <i>frs2-P268T</i> | 2.1 ± 0.5                            |                  |
| <i>frs1-D62N</i>  | 2.1 ± 0.1                            |                  |
| C                 | WT [vec]                             | 1.0 ± 0.5        |
|                   | <i>trm7Δ</i> [vec]                   | 17.8 ± 1.9       |
|                   | <i>trm7Δ</i><br>[ <i>FRS1/FRS2</i> ] | 4.9 ± 0.4        |
|                   | <i>trm7Δ</i> [ <i>FRS1</i> ]         | 23.2 ± 4.6       |
|                   | <i>trm7Δ</i> [ <i>FRS2</i> ]         | 19.4 ± 2.7       |
