# Supplementary material for: Lack of 2'-O-methylation in the tRNA anticodon loop of two phylogenetically distant yeast species activates the general amino acid control pathway
Source: PubMed Central journal article supplement (PMC5892943; doi:10.1371/journal.pgen.1007288), 2018-03-29
Supplement: pgen.1007288.s009.pdf [file pgen.1007288.s009.pdf]

**Table S4. Relative mRNA levels in Fig. 4B.**

| strain                        | <i>HIS5/ACT1</i> |
|-------------------------------|------------------|
| WT [vec]                      | 1.0 ± 0.2        |
| WT [ <i>TEF1</i> ]            | 0.6 ± 0.1        |
| WT [ <i>TEF2</i> ]            | 1.2 ± 0.5        |
| <i>trm7</i> Δ [vec]           | 3.7 ± 0.5        |
| <i>trm7</i> Δ [ <i>TEF1</i> ] | 2.2 ± 0.4        |
| <i>trm7</i> Δ [ <i>TEF2</i> ] | 2.8 ± 0.4        |
