# Supplementary material for: Lack of 2'-O-methylation in the tRNA anticodon loop of two phylogenetically distant yeast species activates the general amino acid control pathway
Source: PubMed Central journal article supplement (PMC5892943; doi:10.1371/journal.pgen.1007288), 2018-03-29
Supplement: pgen.1007288.s010.pdf [file pgen.1007288.s010.pdf]

**Table S5. Relative mRNA levels in Fig. 5A.**

| strain                          | <i>HIS5/ACT1</i> |
|---------------------------------|------------------|
| WT [vec]                        | 1.0 ± 0.2        |
| WT [ <i>tF(GAA)</i> ]           | 1.2 ± 0.3        |
| WT [ <i>tL(UAA)</i> ]           | 1.1 ± 0.1        |
| WT [ <i>tW(CCA)</i> ]           | 1.1 ± 0.5        |
| <i>trm7Δ</i> [vec]              | 3.7 ± 0.5        |
| <i>trm7Δ</i> [ <i>tF(GAA)</i> ] | 1.0 ± 0.4        |
| <i>trm7Δ</i> [ <i>tL(UAA)</i> ] | 4.6 ± 0.5        |
| <i>trm7Δ</i> [ <i>tW(CCA)</i> ] | 5.0 ± 0.6        |
