# Supplementary material for: Lack of 2'-O-methylation in the tRNA anticodon loop of two phylogenetically distant yeast species activates the general amino acid control pathway
Source: PubMed Central journal article supplement (PMC5892943; doi:10.1371/journal.pgen.1007288), 2018-03-29
Supplement: pgen.1007288.s011.pdf [file pgen.1007288.s011.pdf]

**Table S6. Relative mRNA levels in Fig. 6.**

| strain         | <i>HIS5/ACT1</i> |
|----------------|------------------|
| WT             | 1.0 ± 0.4        |
| <i>trm7Δ</i>   | 116.0 ± 3.2      |
| <i>mod5Δ</i>   | 2.2 ± 0.2        |
| <i>trm140Δ</i> | 1.8 ± 0.9        |
| <i>kti12Δ</i>  | 3.2 ± 0.9        |
| <i>uba4Δ</i>   | 2.3 ± 0.1        |
| <i>pus3Δ</i>   | 15.7 ± 1.7       |
