# Supplementary material for: Lack of 2'-O-methylation in the tRNA anticodon loop of two phylogenetically distant yeast species activates the general amino acid control pathway
Source: PubMed Central journal article supplement (PMC5892943; doi:10.1371/journal.pgen.1007288), 2018-03-29
Supplement: pgen.1007288.s012.pdf [file pgen.1007288.s012.pdf]

**Table S7. Relative mRNA levels in Fig. 7.**

| Fig. 7     | strain                                                    | media      | <i>lys4<sup>+</sup>/act1<sup>+</sup></i> | <i>aro8<sup>+</sup></i><br>(SPBC1773.13)<br><i>lact1<sup>+</sup></i> | <i>aro8<sup>+</sup></i><br>(SPAC56E4.03)<br><i>lact1<sup>+</sup></i> |
|------------|-----------------------------------------------------------|------------|------------------------------------------|----------------------------------------------------------------------|----------------------------------------------------------------------|
| B          | WT                                                        | - thiamine | 1.0 ± 0.5                                | 1.0 ± 0.8                                                            | 1.0 ± 0.5                                                            |
|            |                                                           | + thiamine | 1.6 ± 1.0                                | 0.6 ± 0.3                                                            | 2.1 ± 1.1                                                            |
|            | <i>trm7Δ</i> [ <i>P<sub>nmt1</sub> trm7<sup>+</sup></i> ] | - thiamine | 2.0 ± 0.5                                | 1.4 ± 0.3                                                            | 2.8 ± 0.9                                                            |
|            |                                                           | + thiamine | 14.7 ± 1.2                               | 6.9 ± 1.5                                                            | 22.8 ± 3.5                                                           |
|            | WT                                                        | 0 mM 3-AT  | 1.0 ± 0.5                                | 1.0 ± 0.8                                                            | 1.0 ± 0.5                                                            |
|            |                                                           | 10 mM 3-AT | 18.5 ± 5.7                               | 11.8 ± 6.0                                                           | 27.2 ± 6.5                                                           |
| 30 mM 3-AT |                                                           | 24.2 ± 4.9 | 15.6 ± 2.0                               | 29.0 ± 1.7                                                           |                                                                      |
| C          | WT                                                        | - thiamine | 1.0 ± 0.2                                |                                                                      | 1.0 ± 0.3                                                            |
|            | <i>trm732Δ</i>                                            | - thiamine | 1.7 ± 0.5                                |                                                                      | 1.2 ± 0.1                                                            |
|            | <i>trm734Δ</i>                                            | - thiamine | 6.0 ± 0.9                                |                                                                      | 6.5 ± 1.2                                                            |
|            | <i>trm7Δ</i> [ <i>P<sub>nmt1</sub> trm7<sup>+</sup></i> ] | - thiamine | 3.2 ± 0.8                                |                                                                      | 2.5 ± 0.1                                                            |
|            |                                                           | + thiamine | 12.9 ± 2.5                               |                                                                      | 9.0 ± 1.0                                                            |
|            | <i>trm7Δ</i> [ <i>tF(GAA)</i> ]                           | - thiamine | 3.3 ± 0.8                                |                                                                      | 3.5 ± 0.5                                                            |
|            | <i>trm7Δ frs2-F211L</i>                                   | - thiamine | 3.3 ± 0.1                                |                                                                      | 3.3 ± 0.1                                                            |
|            | <i>trm7Δ frs1-I406L</i>                                   | - thiamine | 1.5 ± 0.5                                |                                                                      | 0.7 ± 0.2                                                            |
