# Supplementary material for: Lack of 2'-O-methylation in the tRNA anticodon loop of two phylogenetically distant yeast species activates the general amino acid control pathway
Source: PubMed Central journal article supplement (PMC5892943; doi:10.1371/journal.pgen.1007288), 2018-03-29
Supplement: pgen.1007288.s013.pdf [file pgen.1007288.s013.pdf]

**Table S8. Strains used in this study.**

| Strain name                 | Parent strain | Genotype                                                                       | Source                  |
|-----------------------------|---------------|--------------------------------------------------------------------------------|-------------------------|
| <u><i>S. cerevisiae</i></u> |               |                                                                                |                         |
| BY4741                      |               | <i>MATa his3Δ1 leu2Δ0 met15Δ0 ura3Δ0</i>                                       |                         |
| BY4742                      |               | <i>MATa his3Δ1 leu2Δ0 lys2Δ0 ura3Δ0</i>                                        |                         |
| yMG105                      | BY4741        | <i>trm7Δ::ble<sup>R</sup></i>                                                  | (Guy et al. 2012)       |
| yMG107                      | BY4742        | <i>trm7Δ::ble<sup>R</sup></i>                                                  | This study              |
| YJYW2566                    | BY4741        | <i>MATa leu2Δ0 met15Δ0 ura3Δ0</i>                                              | This study              |
| yMG348-1                    | BY4741        | <i>trm7Δ::ble<sup>R</sup> [CEN URA3 TRM7]</i>                                  | (Guy et al. 2012)       |
| yMG814-1                    | BY4741        | <i>trm732Δ::ble<sup>R</sup></i>                                                | (Guy et al. 2012)       |
| yMG724-5                    | BY4741        | <i>trm734Δ::ble<sup>R</sup></i>                                                | (Guy et al. 2012)       |
| yMAB109                     | BY4741        | <i>tyw1Δ ::kanMX</i>                                                           | (Guy et al. 2012)       |
| yMG818-1                    | yMG724-5      | <i>trm734Δ::ble<sup>R</sup> trm732Δ::kanMX [CEN URA3 TRM734]</i>               | (Guy et al. 2012)       |
| yMG956-1                    | yMG724-5      | <i>trm734Δ::ble<sup>R</sup> tyw1Δ::kanMX [CEN URA3 TRM734]</i>                 | (Guy et al. 2012)       |
| yMG899-1                    | yMG814-1      | <i>trm732Δ::ble<sup>R</sup> tyw1Δ::kanMX [CEN URA3 TRM732]</i>                 | (Guy et al. 2012)       |
| YK1277                      | BY4741        | <i>pha2Δ ::kanMX</i>                                                           | This study              |
| YK1282                      | yMG348-1      | <i>trm7Δ::ble<sup>R</sup> pha2Δ ::kanMX [CEN URA3 TRM7]</i>                    | This study              |
| YLH1421                     | BY4741        | <i>gcn2Δ::kanMX</i>                                                            | This study              |
| YLH1422                     | yMG348-1      | <i>trm7Δ::ble<sup>R</sup> gcn2Δ::kanMX [CEN URA3 TRM7]</i>                     | This study              |
| YK1281                      | BY4741        | <i>gcn4Δ::hygro<sup>R</sup></i>                                                | This study              |
| YK1279                      | yMG348-1      | <i>trm7Δ::ble<sup>R</sup> gcn4Δ::hygro<sup>R</sup> [CEN URA3 TRM7]</i>         | This study              |
| ySD179                      | BY4742        | <i>trm140Δ::ble<sup>R</sup></i>                                                | (Han et al. 2017)       |
| ySD844                      | BY4741        | <i>mod5Δ::kanMX</i>                                                            | (Han et al. 2017)       |
| YK428-1                     | BY4741        | <i>pus3Δ::ble<sup>R</sup></i>                                                  | (Han et al. 2015)       |
| YLH442                      | BY4741        | <i>kti12Δ::kanMX</i>                                                           | This study              |
| YLH443                      | BY4741        | <i>uba4Δ::kanMX</i>                                                            | This study              |
| YK1424                      | BY4741        | <i>maf1Δ::kanMX</i>                                                            | This study              |
| yMG323-1                    | BY4741        | <i>tef2Δ::kanMX</i>                                                            | This study              |
| yMG342-2                    | yMG348-1      | <i>trm7Δ::ble<sup>R</sup> tef2Δ::hygro<sup>R</sup> [CEN URA3 TRM7]</i>         | This study              |
| YK1423                      | yMG348-1      | <i>trm7Δ::ble<sup>R</sup> maf1Δ::kanMX [CEN URA3 TRM7]</i>                     | This study              |
| <u><i>S. pombe</i></u>      |               |                                                                                |                         |
| SP286                       |               | WT diploid <i>ade6-M210/ade6-M216 ura4-D18/ura4-D18 leu1-32/leu1-32</i>        | Bioneer                 |
| yMG957B                     | SP286         | WT haploid                                                                     | (Guy and Phizicky 2015) |
| yMG1052A                    | SP286         | <i>trm7Δ::kanMX [ura4<sup>+</sup> P<sub>nmt1</sub> trm7<sup>+</sup>]</i>       | (Guy and Phizicky 2015) |
| yMG1541                     | SP286         | <i>trm7Δ::kanMX [LEU2 P<sub>nmt1</sub> low strength trm7<sup>+</sup>]</i>      | This study              |
| yMG1289-1                   | SP286         | <i>trm734Δ::kanMX [ura4<sup>+</sup> P<sub>trm734</sub> trm734<sup>+</sup>]</i> | (Guy and Phizicky 2015) |
| yMG958B                     | SP286         | <i>trm732Δ::kanMX</i>                                                          | (Guy and Phizicky 2015) |
