# Supplementary material for: Lack of 2'-O-methylation in the tRNA anticodon loop of two phylogenetically distant yeast species activates the general amino acid control pathway
Source: PubMed Central journal article supplement (PMC5892943; doi:10.1371/journal.pgen.1007288), 2018-03-29
Supplement: pgen.1007288.s014.pdf [file pgen.1007288.s014.pdf]

**Table S9. Plasmids used in this study.**

| Plasmid  | Parent   | Description                                                      | Source                  |
|----------|----------|------------------------------------------------------------------|-------------------------|
| pAVA579  |          | <i>CEN URA3 LIC</i>                                              | (Quartley et al. 2009)  |
| pMG13    | pAVA579  | <i>CEN URA3 TRM7</i>                                             | (Guy et al. 2012)       |
| pBP2A    | pAVA579  | <i>CEN URA3 TRM734</i>                                           | (Guy et al. 2012)       |
| pMG236A  | pAVA579  | <i>CEN URA3 TRM732</i>                                           | This study              |
| pBG2619  |          | 2 $\mu$ <i>LEU2 P<sub>GAL1,10</sub> LIC</i>                      | (Quartley et al. 2009)  |
| pMG237E  | pBG2619  | 2 $\mu$ <i>LEU2 P<sub>GAL</sub> FRS1-PT FRS2-NT</i>              | This study              |
| pMG189A  | pBG2619  | 2 $\mu$ <i>LEU2 P<sub>gal</sub> FRS1-NT</i>                      | This study              |
| pMG232A  | pBG2619  | 2 $\mu$ <i>LEU2 P<sub>gal</sub> FRS2-NT</i>                      | This study              |
| pMAB813A |          | 2 $\mu$ <i>LEU2 tH(GUG)</i>                                      | (Guy et al. 2012)       |
| pMG16A   | pMAB813A | 2 $\mu$ <i>LEU2 tF(GAA)</i>                                      | (Guy et al. 2012)       |
| pMG18B   | pMAB813A | 2 $\mu$ <i>LEU2 tW(CCA)</i>                                      | (Guy et al. 2012)       |
| pMG24A   | pMAB813A | 2 $\mu$ <i>LEU2 tL(UAA)</i>                                      | (Guy et al. 2012)       |
| AVA 581  |          | <i>CEN LEU2 LIC</i>                                              | (Quartley et al. 2009)  |
| EJD066-1 | AVA 581  | <i>CEN LEU2 TEF1</i>                                             | This study              |
| EJD067-1 | AVA 581  | <i>CEN LEU2 TEF2</i>                                             | This study              |
| pREP4X   |          | <i>ura4<sup>+</sup> P<sub>nmt1</sub></i>                         | (Forsburg 1993)         |
| pMG360A  | pREP4X   | <i>ura4<sup>+</sup> P<sub>nmt1</sub> sp trm7<sup>+</sup></i>     | (Guy and Phizicky 2015) |
| pMG426G  | pREP4X   | <i>ura4<sup>+</sup> P<sub>trm734</sub> sp trm734<sup>+</sup></i> | (Guy and Phizicky 2015) |
| pREP81X  |          | <i>LEU2 P<sub>nmt1</sub> low strength</i>                        | (Forsburg 1993)         |
| pMG527B  | pREP81X  | <i>LEU2 P<sub>nmt1</sub> low strength sp trm7<sup>+</sup></i>    | (Guy and Phizicky 2015) |
| pREP3X   |          | <i>LEU2 P<sub>nmt1</sub></i>                                     | (Forsburg 1993)         |
| pMG308C  | pREP3X   | <i>LEU2 sp tF(GAA)</i>                                           | (Guy and Phizicky 2015) |
